# Supplementary material
Source: PubMed Central journal article supplement (PMC1885578)
Supplement: pnas_0701124104_1.pdf [file pnas_0701124104_1.pdf]

|          |                                                                        |            |            |            |            |            |           |
|----------|------------------------------------------------------------------------|------------|------------|------------|------------|------------|-----------|
|          |                                                                        | <u>α1</u>  |            | <u>β1</u>  | <u>α2</u>  |            |           |
| mMunc18c | MAPPVSE-----RGLKSVVWRKIKTAVFDDCRKEGE-----WKIMLLDEFTTKLLSSC             |            |            |            |            | 48         |           |
| rMunc18a | MAP-----IGLKAVVGEKIMHDVIKKVKKKGE-----WKVLVVDQLSMRMLSSC                 |            |            |            |            | 44         |           |
| sSec1    | M-----ALKTAVHEKIMNDVVLAVKKNAE-----WKVLIVDQLSMRMVSAC                    |            |            |            |            | 41         |           |
| Sly1p    | MAVEEIASR-KDISLRDMQISAILKMLFLNKLNNNDNITTITDDIFNQEIWKVLILDIKSTATISSV    |            |            |            |            | 69         |           |
|          |                                                                        | <u>α3</u>  | <u>β2</u>  | <u>β3</u>  | <u>α4</u>  | <u>β4</u>  |           |
| mMunc18c | CKMTDLLEEGITVIENIYKNREPVRQMKALYFISPTPKSVDCFLRDFGSKSEKKYKAAIYFTDFCPDS   |            |            |            |            | 117        |           |
| rMunc18a | CKMTDIMTEGITIVEDINKRREPLPSLEAVYLITPSEKSVHSLISDFKDPPTAKYRAAHVFFTDSCPDA  |            |            |            |            | 113        |           |
| sSec1    | CKMHEIMSEGITLVEDINRRREPLPLLEAVYLITPTEESVKCLMADFQNPDPNPQYRGAIHFFTEACPEE |            |            |            |            | 110        |           |
| Sly1p    | LRVNDLLKAGITVHSLIKQDRSPLPDVPAIYFVSPTEKENIDIIVNDLKS---DKYSEFYINFTSSLPRN |            |            |            |            | 135        |           |
|          |                                                                        | <u>α5</u>  | <u>β5</u>  | <u>β6</u>  | <u>β7</u>  | <u>α6</u>  | <u>α7</u> |
| mMunc18c | LFNKIKASC-----SKSIRRCKEINISFIPQESQVYTLDVDPDAFYCYSPDPSNASRKEVVMEMAEQI   |            |            |            |            |            | 181       |
| rMunc18a | LFNELVKS---RAAKVIKTLTEINIAFLPYESQVYSLDSADSFQSFYSP--HKAQMKNPILERLAEQI   |            |            |            |            |            | 176       |
| sSec1    | LFKELCKS---TTARFIKTLKEINIAFLPYESQIFSLDSPDTFQVYYP--SRAQGGIPNKERCAEQI    |            |            |            |            |            | 173       |
| Sly1p    | LLEDLAQQVSIQKSDKIKQVYDQYLDIVTEPELFSLEISNAYLTLNDPK-TTEEBITGLCANIADGL    |            |            |            |            |            | 203       |
|          |                                                                        | <u>β8</u>  | <u>α8</u>  | *          | <u>β9</u>  |            |           |
| mMunc18c | VTVCATLDENPGVRYK--SKPLDNASKLAQLVEKKLEDDYKIDEKGLIK--KTQSQLLIIDRGFDPVS   |            |            |            |            | 246        |           |
| rMunc18a | ATLCATLKEYPAVRYR--GEYKDNAL-LAQLIQDKLDAY-KADDPTMGEGPDKARSQLLILDRGFDPSS  |            |            |            |            | 241        |           |
| sSec1    | ATLCATLGEYPSVRYR--SDFDENAS-FAQLVQOKLDAY-RADDPTMGEGPQKDRSQLLILDRGFDPIS  |            |            |            |            | 238        |           |
| Sly1p    | FNTVLTINSIPIIRAAGGPAEIIAEKLGTKLRDFVINTNSSSTSTLQGNDSLRLGVLIILDRNIDFAS   |            |            |            |            | 272        |           |
|          |                                                                        | <u>α9</u>  | <u>β10</u> | <u>β11</u> | <u>α10</u> | <u>α11</u> |           |
| mMunc18c | TVLHELTFQAMAYDLL-----PIENDTYKYKTDG----KEKEAVLEEDDDLVVRVRRHIAVVLE       |            |            |            |            | 302        |           |
| rMunc18a | PVLHELTFQAMAYDLL-----PIENDVYKYETSGIGEARVKEVLLDEDDDLWIALRKHIAEVSQ       |            |            |            |            | 301        |           |
| sSec1    | PLLHELTFQAMAYDLL-----PIENDVYKYVNTGGNEVPEKEVLLDEKDDLWEMRHHQHIAVVSQ      |            |            |            |            | 298        |           |
| Sly1p    | MFSHSWIYQCMVFDIFKLSRNTVTIPLSKENGTDNTTAKPLATKKYDIEPNDFWMENSHLPFFPEAAE   |            |            |            |            | 356        |           |
|          |                                                                        |            |            |            | <u>α12</u> |            |           |
| mMunc18c | EIPKLMKEISSTKKATEG--KTSLSALTQLMK-----KMPHFRKQISKQVVHLNLAEDCMNKFKLNI    |            |            |            |            | 362        |           |
| rMunc18a | EVTRSLKDFSSSKRMNTG-EKTTMRDLSQMLK-----KMPQYQKELSKYSTHLHLAEDCMKHYYGTV    |            |            |            |            | 362        |           |
| sSec1    | NVTKCLKQFADEKRMGTAADKAGIKDLSQMLK-----KMPQYQKELSKYSTHLHLAEDCMKQYQQHV    |            |            |            |            | 360        |           |
| Sly1p    | NVEAALNTYKEEAETR--KTGVNTISDLDPNSSNNDTVQIQEVVKKLPELTAKKNTIDTHMNIFAALL   |            |            |            |            | 408        |           |
|          |                                                                        | <u>α13</u> | <u>α14</u> | <u>α15</u> | <u>α16</u> |            |           |
| mMunc18c | EKLCKTEQDLALGTDABGQRVKDSMLVLLPVLLNKNHNDCKIR-AVLLYIFGINGTTEENLDRLIHNV   |            |            |            |            | 430        |           |
| rMunc18a | DKLCRVEQDLAMGTDABGEKIKDPMRAIVPILLDANVSTYDKIR-IILLYIFLKNGITTEENLNKLIQHA |            |            |            |            | 430        |           |
| sSec1    | DKLCKVEQDLAMGTDADGEKIRDHMRNIVPILLDQKISAYDKIR-IILLYIIHKGGISEENLAKLVQHA  |            |            |            |            | 428        |           |
| Sly1p    | SQLESKSLDTFFEVEQDPGSKTKRSRFLDILKDGKTNLEDKLRSFIVLYLTSTTGLPKDFVQNVENYF   |            |            |            |            | 477        |           |
|          |                                                                        | <u>α17</u> |            |            |            |            |           |
| mMunc18c | KIE-DDSDMIRNWSHLGVPVPPS---QOAKP----LRKDRSAEETFQ-----LSRW               |            |            |            |            | 474        |           |
| rMunc18a | QIPPEDSEIITNMAHLGVPVIVTDSTLRRRSKP---ERKERISEQTYQ-----LSRW              |            |            |            |            | 478        |           |
| sSec1    | HIPAEKWIINDMQNLGVPPIIQDGGRRKIPQPYHHTNRKERQADHTYQ-----MSRW              |            |            |            |            | 480        |           |
| Sly1p    | KENDYDINALKYVYKLRREFMQLSNMSLQNKSLSDGSDSAFKPSNLTLSGIYGLTEGKLQGGVGSLSIGI |            |            |            |            | 546        |           |
|          |                                                                        | <u>α18</u> |            |            | <u>β12</u> |            |           |
| mMunc18c | TPFIKDIMEDAIDNRLDSKEWPYCSRPCPAVWNGSGAVSARQ-KPRTNYL-ELDRKNGSRLIIFVIGGIT |            |            |            |            | 541        |           |
| rMunc18a | TPIIKDIMEDTIEDKLDTKHYPIISTRSSASFSTTAVSARYGHWHKKA-PGEYRSGPRLIIFILGGVS   |            |            |            |            | 546        |           |
| sSec1    | TPYMKDIMEAAVEDKLDTRHYPLFNGGGPRPSCQPPVSVRYGHWHKDKG-QASYKSGPRLIIFVVGGIS  |            |            |            |            | 548        |           |
| Sly1p    | KKLLPEKKTIPITNVVDAIMDPLNSSQKNLETTDSYLYIDPKITRGSHTRKPKRQSYNKSIVFVVGGN   |            |            |            |            | 615        |           |
|          |                                                                        | <u>α19</u> | <u>β13</u> | <u>α20</u> |            |            |           |
| mMunc18c | YSEMRCAYEVSQ--AHKSCEVIIGSTHILTPRKLLDDIKMLNKSCKDKVSPKDE                 |            |            |            |            | 592        |           |
| rMunc18a | LNEMRCAYEVTQ--ANGKWEVLIIGSTHILTPQKLLDTLKKNKTDEEISS---                  |            |            |            |            | 594        |           |
| sSec1    | YSEMRSAEYVTQT-AKNNWEVILIGSTHILTPGELLRLDRKISNP-----                     |            |            |            |            | 591        |           |
| Sly1p    | YLEYQNLQEWASQLHNPVKVYMGSTAITTPAEFLNEISRLGASNSSNDA--                    |            |            |            |            | 666        |           |
