# Supplementary material
Source: PubMed Central journal article supplement (PMC1885578)
Supplement: pnas_0701124104_2.pdf [file pnas_0701124104_2.pdf]

**Table 2. Interactions between Munc18c and Stx4<sub>1-19</sub>**

The Stx4 N-peptide forms 13 hydrogen bonds (<3.4 Å) and 140 atom:atom van der Waals contacts (<4 Å) with Munc18c. The atoms involved in the hydrogen bonds are listed in the first section of the table, and the residues (rather than atoms) involved in van der Waals interactions are listed in the second section. Stx4 intramolecular hydrogen bonds are shown in the third section of the table. For hydrogen bonds, residues conserved in the Stx or SM protein are shown in bold, and, where they are not conserved, the aligned residue is shown in parentheses for Stx1a, Sed5p, Munc18-1 (M18-1), and Sly1p.

| <b>Hydrogen bonds</b>           |                                                                                                   |                    |
|---------------------------------|---------------------------------------------------------------------------------------------------|--------------------|
| <b>Stx4</b>                     | <b>Munc18c</b>                                                                                    | <b>Distance, Å</b> |
| Arg2:O (Stx1a:Lys2; Sed5p:Lys4) | <b>Glu135:N</b> (Sly1p:Asp158)                                                                    | 2.6                |
| Arg2:NE                         | <b>Asn137:OD1</b> (Sly1p:Tyr160)                                                                  | 3.4                |
| Arg2:NH2                        | <b>Ile136:O</b>                                                                                   | 2.6                |
| <b>Asp3:N</b>                   | Glu223:OE1 (M18-1:Asp216)                                                                         | 2.8                |
| <b>Asp3:OD2</b>                 | Arg132:NH2 (M18-1:Thr129; Sly1p:Gln155)                                                           | 2.5                |
| <b>Asp3:OD2</b>                 | Lys134:NZ (M18-1:Thr131; Sly1p:Tyr157)                                                            | 2.8                |
| <b>Arg4:N</b>                   | Cys133:O (M18-1:Leu130; Sly1p:Val156)                                                             | 2.8                |
| <b>Arg4:NH1</b>                 | <b>Cys114:O</b> (Slyp:Leu132)                                                                     | 2.8                |
| <b>Arg4:NH1</b>                 | <b>Glu135:OE1</b>                                                                                 | 2.9                |
| <b>Thr5:N</b>                   | Cys133:O                                                                                          | 3.1                |
| <b>Thr5:OG1</b>                 | Cys133:N                                                                                          | 3.1                |
| <b>Arg9:NH1</b> (Sed5p:Gln11)   | <b>Ile130:O</b> (Sly1p:Ile153)                                                                    | 3.3                |
| <b>Arg9:NH1</b>                 | <b>Ile130:O</b>                                                                                   | 2.7                |
| <b>Van der Waals contacts</b>   |                                                                                                   |                    |
| <b>Met1</b>                     | Phe113, <b>Glu135</b> , Ile221, Glu223                                                            |                    |
| Arg2                            | <b>Glu135</b> , <b>Ile136</b> , <b>Asn137</b> , <b>Tyr218</b> , <b>Asp222</b> ,<br>Glu223, Lys224 |                    |
| <b>Asp3</b>                     | Arg132, Cys133, Lys134, Glu223,                                                                   |                    |
| <b>Arg4</b>                     | <b>Cys114</b> , <b>Phe119</b> , Cys133, <b>Glu135</b>                                             |                    |

---

|              |                                               |
|--------------|-----------------------------------------------|
| <b>Thr5</b>  | Arg131, Arg132, Cys133                        |
| <b>Glu7</b>  | <b>Phe119</b>                                 |
| <b>Leu8</b>  | <b>Phe119</b> , Ile122, Cys126, <b>Ile130</b> |
| <b>Arg9</b>  | <b>Lys128</b> , <b>Ile130</b> , Arg131        |
| Asp12        | <b>Phe119</b> , <b>Asn120</b>                 |
| <b>Asp16</b> | <b>Asn120</b>                                 |

---

| <b>Intramolecular hydrogen bonds</b> |                 | <b>Distance, Å</b> |
|--------------------------------------|-----------------|--------------------|
| <b>Asp3:OD1</b>                      | <b>Thr5:N</b>   | 3.3                |
| <b>Asp3:OD1</b>                      | <b>Thr5:OG1</b> | 2.9                |
| <b>Asp3:OD2</b>                      | <b>Thr5:OG1</b> | 3.5                |
| <b>Arg4:O</b>                        | <b>Glu7:N</b>   | 3.3                |
| <b>Arg4:O</b>                        | <b>Leu8:N</b>   | 3.2                |
| <b>Glu7:OE1</b>                      | <b>Arg4:NE</b>  | 2.9                |
| <b>Glu7:OE1</b>                      | <b>Arg4:NH2</b> | 3.1                |

---
